# Supplementary material
Source: PubMed Central journal article supplement (PMC2519706)
Supplement: supp_28_16_5082__1.pdf [file supp_28_16_5082__1.pdf]

### Supplemental Table S1.

Frequency of viable progeny resulting from crosses between *Ercc1*<sup>+/-</sup>*Ku86*<sup>+/-</sup> and *Ercc1*<sup>+/ $\Delta$</sup> *Ku86*<sup>+/-</sup> mice.

| Genotype                                                                 | Observed   | Expected*  |
|--------------------------------------------------------------------------|------------|------------|
| wt                                                                       | 17 (8 %)   | 14 (6 %)   |
| <i>Ku86</i> <sup>-/-</sup>                                               | 35 (16 %)  | 41 (19 %)  |
| <i>Ercc1</i> <sup>-/<math>\Delta</math></sup>                            | 34 (15 %)  | 41 (19 %)  |
| <i>Ercc1</i> <sup>-/<math>\Delta</math></sup> <i>Ku86</i> <sup>-/-</sup> | 0 (0 %)∞   | 14 (6 %)   |
| <b>Heterozygotes</b> <sup>†</sup>                                        | 134 (61 %) | 110 (50 %) |

\*n=220 offspring from 20 litters.

<sup>†</sup> includes *Ercc1*<sup>+/-</sup>, *Ku86*<sup>+/-</sup>, *Ercc1*<sup>+/ $\Delta$</sup> , *Ercc1*<sup>+/-</sup> *Ku86*<sup>+/-</sup> and *Ercc1*<sup>+/ $\Delta$</sup>  *Ku86*<sup>+/-</sup>

∞ p-value <0.001.

### Supplemental Table S2.

Frequency of *Ercc1*<sup>-/-</sup> *Ku86*<sup>-/-</sup> embryos (E13.5-16.5) resulting from crosses between *Ercc1*<sup>+/-</sup> *Ku86*<sup>+/-</sup> mice.

| Genotype                                               | Observed  | Expected* |
|--------------------------------------------------------|-----------|-----------|
| wt                                                     | 6 (4 %)   | 8 (6 %)   |
| <i>Ku86</i> <sup>-/-</sup>                             | 19 (14 %) | 26 (19 %) |
| <i>Ercc1</i> <sup>-/-</sup>                            | 14 (10 %) | 26 (19 %) |
| <i>Ercc1</i> <sup>-/-</sup> <i>Ku86</i> <sup>-/-</sup> | 7 (5 %)   | 8 (6 %)   |
| <b>Heterozygous</b> <sup>†</sup>                       | 90 (67 %) | 68 (50 %) |

\*n=136 offspring from 15 litters.

<sup>†</sup> includes *Ercc1*<sup>+/-</sup>, *Ku86*<sup>+/-</sup> and *Ercc1*<sup>+/-</sup> *Ku86*<sup>+/-</sup>

**Supplementary Table S3.** Nucleotide sequences of junctions from DNA substrates with blunt ends after joining in the wt and *Ercc1*<sup>-/-</sup> cells. Unmodified sequence is shown at the top of each genotype. Red denotes nucleotides deleted and bold denotes sequences of microhomology. n is the number of DNA ends sequenced for each genotype.

| Blunt ends                                                 | n  | size of deletion | size of μhomology | size of insertion |
|------------------------------------------------------------|----|------------------|-------------------|-------------------|
| 5'GGTACCGCGGGCCC GGGATCCACCGGTCG                           |    |                  |                   |                   |
| 3'CCATGGCGCCCGGG CCCTAGGTGGCCAGC                           |    |                  |                   |                   |
| <b>wt</b>                                                  |    |                  |                   |                   |
| ACTCAGATCT <b>cgag</b> -- <b>accg</b> <b>CG</b> GGCCCCGGA  | 13 | 33               | 2                 | 0                 |
| TGAGTCTAGAG <b>CTc</b> -- <b>tggcgc</b> CCGGGCCCT          |    |                  |                   |                   |
| TACCGCGGGC <b>ggat</b> -- <b>ttca</b> CCGGGGTGGTG          | 1  | 50               | 0                 | 0                 |
| ATGGCGCCCG <b>ccta</b> -- <b>aagt</b> GCCCCACCAC           |    |                  |                   |                   |
| TGGCGGTAG <b>gcg</b> t-- <b>cg</b> gATCCACCGGTC            | 1  | 127              | 1                 | 0                 |
| ACCGCCAT <b>ccgca</b> -- <b>gcc</b> CTAGGTGGCCAG           |    |                  |                   |                   |
| TGTACGGTGG <b>gagg</b> -- <b>gcga</b> CGTAAACGGCC          | 1  | 196              | 0                 | 0                 |
| ACATGCCACC <b>ctcc</b> -- <b>cgct</b> GCATTGCGG            |    |                  |                   |                   |
| GGAGTTTGT <b>TTtgg</b> -- <b>tttt</b> CACTGCATTCT          | 1  | 1134             | 2                 | 0                 |
| CCTCAAAC <b>aaaacc</b> -- <b>aa</b> <b>AA</b> GTGACGTAAGA  |    |                  |                   |                   |
| CCGCGGGC <b>CCggga</b> -- <b>cacc</b> ATGGTGAGCAA          | 1  | 20               | 2                 | 0                 |
| GGCGCCCG <b>ggccct</b> -- <b>gt</b> <b>GG</b> TACCACCTCGTT |    |                  |                   |                   |
| Blunt ends                                                 | n  | size of deletion | size of μhomology | size of insertion |
| 5'GGTACCGCGGGCCC GGGATCCACCGGTCG                           |    |                  |                   |                   |
| 3'CCATGGCGCCCGGG CCCTAGGTGGCCAGC                           |    |                  |                   |                   |
| <b>Ercc1</b>                                               |    |                  |                   |                   |
| ACTCAGATCT <b>cgag</b> -- <b>accg</b> <b>CG</b> GGCCCCGGG  | 16 | 33               | 2                 | 0                 |
| TGAGTCTAGAG <b>CTc</b> -- <b>tggcgc</b> CCGGGCCCT          |    |                  |                   |                   |
| TACCGGACTC <b>agat</b> -- <b>gcaa</b> GGGCGAGGAG           | 1  | 81               | 0                 | 0                 |
| ATGGCCTGAG <b>tcta</b> -- <b>cg</b> ttCCCGCTCCTC           |    |                  |                   |                   |
| TCTCGAGC <b>TCaagc</b> -- <b>gatc</b> CACCGGTCGC           | 1  | 43               | 2                 | 0                 |

AGAGCTCG**agttag--ct**AGGTGGCCAGCG

CCACCCATT**gacg--tgga**CGGCGACGTA

3

221

0

0

GGTGGGGTAA**ctgc--acct**GCCGCTGCAT

---

**Supplementary Table S4.** Nucleotide sequences of junctions from DNA substrates with compatible ends after joining in the *wt* and *Erccl*<sup>-/-</sup> cells. Unmodified sequence is shown at the top of each genotype. Red denotes nucleotides deleted, bold denotes sequences of microhomology and green represent nucleotides added during the process of ligation. n is the number of DNA ends sequenced for each genotype.

| Compatible ends                                   |                 | n  | size of deletion | size of $\mu$ homology | size of insertion |
|---------------------------------------------------|-----------------|----|------------------|------------------------|-------------------|
| 5' ATCTCGAGCTCA                                   | AGCTTCGAATTCTGC |    |                  |                        |                   |
| 3' TAGAGCTCGAGTTCGA                               | AGCTTAAGACG     |    |                  |                        |                   |
| <b>wt</b>                                         |                 |    |                  |                        |                   |
| TCAGATCT <b>CGagct</b> -- <b>cgcg</b> GGCCCCGGGAT |                 | 12 | 36               | 2                      | 0                 |
| AGTCTAGAg <b>ctcga</b> -- <b>gc</b> GCCCGGGCCCTA  |                 |    |                  |                        |                   |
| ATCTCGAGCTCAAGC <b>CTTCGA</b> ATTCTGCAGT          |                 | 1  | 0                | 0                      | 1                 |
| TAGAGCTCGAGTTCG <b>GAAGCT</b> TAAAGACGTCA         |                 |    |                  |                        |                   |
| TAAGCAGAG <b>Ctgg</b> t-- <b>ggcc</b> CGGGATCCACC |                 | 1  | 90               | 1                      | 0                 |
| ATATCTGGAg <b>acca</b> -- <b>ccg</b> GGCCCTAGGTGG |                 |    |                  |                        |                   |
| TACCGGACTC <b>agat</b> -- <b>agcg</b> TGTCCGGCGAG |                 | 1  | 159              | 0                      | 0                 |
| ATGGCCTGAG <b>tcta</b> -- <b>tcgc</b> ACAGGCCGCTC |                 |    |                  |                        |                   |
| ACCGTCAGAT <b>ccgc</b> -- <b>gacg</b> GTACCGGGGC  |                 | 1  | 57               | 0                      | 0                 |
| TGGCAGTCTAg <b>gcg</b> -- <b>ctgc</b> CATGGCGCCCG |                 |    |                  |                        |                   |
| CGGACTCAGAt <b>ctc</b> -- <b>cgac</b> CGTAAACGGCC |                 | 1  | 132              | 0                      | 0                 |
| GCCTGAGTCT <b>agag</b> -- <b>gctg</b> GCATTTGCCGG |                 |    |                  |                        |                   |
| CCACCCATT <b>gacg</b> -- <b>tgga</b> CGGCGACGTAA  |                 | 1  | 221              | 0                      | 0                 |
| GGTGGGGTAA <b>ctgc</b> -- <b>acct</b> GCCGCTGCATT |                 |    |                  |                        |                   |
| Compatible ends                                   |                 | n  | size of deletion | size of $\mu$ homology | size of insertion |
| 5' ATCTCGAGCTCA                                   | AGCTTCGAATTCTGC |    |                  |                        |                   |
| 3' TAGAGCTCGAGTTCGA                               | AGCTTAAGACG     |    |                  |                        |                   |
| <b>Erccl</b>                                      |                 |    |                  |                        |                   |
| TCAGATCT <b>CGagct</b> -- <b>cgcg</b> GGCCCCGGGAT |                 | 6  | 36               | 2                      | 0                 |
| AGTCTAGAg <b>ctcga</b> -- <b>gc</b> GCCCGGGCCCTA  |                 |    |                  |                        |                   |

---

|                                           |   |     |   |   |
|-------------------------------------------|---|-----|---|---|
| ATCTCGAGCTCAAG <b>AGC</b> TTCGAATTCTGCAGT | 1 | 0   | 0 | 3 |
| TAGAGCTCGAGTT <b>TCG</b> AAGCTTAAGACGTCA  |   |     |   |   |
| ACTCAGATC <b>Tcgag--cgg</b> tACCCGCGGCC   | 1 | 33  | 1 | 0 |
| TGAGTCTAG <b>agctc--gcc</b> ATGGCGCCCGG   |   |     |   |   |
| ACTCAGATC <b>Gtcga--gca</b> GGGCGAGGGC    | 1 | 162 | 0 | 0 |
| TGAGTCTAG <b>agct--cgct</b> CCCGCTCCCG    |   |     |   |   |
| AGGCGTGTAC <b>ggtg--ccct</b> GGCCCACCCT   | 1 | 308 | 2 | 0 |
| TCCGCACAT <b>GCCac--gggacc</b> GGGTGGGA   |   |     |   |   |
| GCGGTAGG <b>CGtgta--gacg</b> GTACCGCGGG   | 1 | 108 | 2 | 0 |
| CGCCATCC <b>gcacat--ct</b> GCATGGCGCCC    |   |     |   |   |
| TCAGATC <b>TCGagct--gtcg</b> CCACCATGGT   | 1 | 57  | 3 | 0 |
| AGTCTAG <b>agctcga--AGC</b> cGGTGGTACCA   |   |     |   |   |
| GGCGGTAGG <b>Cgtgt--gttc</b> ACCGGGGTGG   | 1 | 170 | 1 | 0 |
| CCGCCATCC <b>gcaca--caa</b> GTTGGTCCTACC  |   |     |   |   |
| TCAGATCCG <b>ctagc--cact</b> CTCGGCATGG   | 1 | 779 | 0 | 0 |
| AGTCTAGG <b>Catcg--gtga</b> GAGCCGTACC    |   |     |   |   |
| CCGCCCCATT <b>gacg--tgga</b> CGGCGACGTA   | 1 | 221 | 0 | 0 |
| GGCGGGGTA <b>actgc--acct</b> GCCGCTGCAT   |   |     |   |   |
| GAACCGTCAG <b>tccg--ccat</b> GGTIGAGCAAG  | 1 | 93  | 0 | 0 |
| CTTGGCAGTC <b>aggc--ggt</b> aCCACTCGTTC   |   |     |   |   |
| AATGGGAGTT <b>tggt--ggca</b> TCGACTTCAA   | 1 | 595 | 1 | 0 |
| TTACCCTCAA <b>Acaa--ccgta</b> GCTGAAGTT   |   |     |   |   |

---

**Supplementary Table S5.** Nucleotide sequences of junctions from DNA substrates with non compatible ends after joining in the *wt* and *Ercc1*<sup>-/-</sup> cells. Unmodified sequence is shown at the top of each genotype. Red denotes nucleotides deleted, bold denotes sequences of microhomology and green represent nucleotides added during the process of ligation. n is the number of DNA ends sequenced for each genotype.

| Non-compatible ends                              |                         | n | size of deletion | size of μhomology | size of insertion |
|--------------------------------------------------|-------------------------|---|------------------|-------------------|-------------------|
| 5' TCAGATCTCGAGCT                                | CGCGGGCCCG              |   |                  |                   |                   |
| 3' AGTCTAGAGC                                    | CATGGCGCCCGGGC          |   |                  |                   |                   |
| <b>wt</b>                                        |                         |   |                  |                   |                   |
| TCAGATCTCG <b>agct</b>                           | CGCGGGCCCG              | 1 | 8                | 0                 | 0                 |
| AGTCTAGAGC                                       | <b>catg</b> GGCGCCCGGGC |   |                  |                   |                   |
| TCAGATCT <b>CGagct</b>                           | <b>cgcg</b> GGCCCG      | 6 | 12               | 2                 | 0                 |
| AGTCTAGAG <b>c</b>                               | <b>catggc</b> GCCCGGGC  |   |                  |                   |                   |
| TCAGATCTCG <b>agct</b>                           | <b>c</b> GGCGGGCCCG     | 1 | 9                | 0                 | 0                 |
| AGTCTAGAGC                                       | <b>catgg</b> CGCCCGGGC  |   |                  |                   |                   |
| TCAGATCT <b>CGagct</b>                           | <b>cg</b> CGGGCCCG      | 1 | 10               | 2                 | 0                 |
| AGTCTAGAG <b>c</b>                               | <b>catg</b> GCCCGGGC    |   |                  |                   |                   |
| TCAGATCTCG <b>Agct</b>                           | <b>TAC</b> CGCGGGCCCG   | 4 | 3                | 1                 | 4                 |
| AGTCTAGAG <b>T</b>                               | <b>CAT</b> GGCGCCCGGGC  |   |                  |                   |                   |
| TCAGATCT <b>Tcgagct</b>                          | <b>AC</b> CGCGGGCCCG    | 2 | 8                | 1                 | 2                 |
| AGTCTAGAG <b>c</b>                               | <b>cA</b> TGGCGCCCGGGC  |   |                  |                   |                   |
| TCAGATCTCG <b>agct</b>                           | <b>GTAC</b> CGCGGGCCCG  | 1 | 4                | 0                 | 4                 |
| AGTCTAGAGC                                       | CATGGCGCCCGGGC          |   |                  |                   |                   |
| TCAGATCTCG <b>Agct</b>                           | <b>CC</b> CGGGCCCG      | 1 | 3                | 1                 | 2                 |
| AGTCTAGAGC                                       | <b>caT</b> GGCGCCCGGGC  |   |                  |                   |                   |
| TCAGATCTCGAGCT                                   | <b>CC</b> CGGGCCCG      | 1 | 4                | 0                 | 7                 |
| AGTCTAGAGC <b>TCGA</b>                           | <b>cat</b> GGCGCCCGGGC  |   |                  |                   |                   |
| TCAGATCTCG <b>agct</b>                           | <b>CC</b> CGGGCCCG      | 1 | 7                | 0                 | 1                 |
| AGTCTAGAGC                                       | <b>cat</b> GGCGCCCGGGC  |   |                  |                   |                   |
| CGCTAC <b>CGA</b> ctca-- <b>gga</b> TCCACCGGTTCG |                         | 1 | 28               | 3                 | 0                 |

|                                 |   |     |   |   |
|---------------------------------|---|-----|---|---|
| CGGATGGcctgagt--CCTAGGTGGCCAGC  |   |     |   |   |
| TACCGGACTCagat--gccGGGATCCACC   | 1 | 21  | 1 | 0 |
| ATGGCCTGAgctcta--cggGCCCTAGGTGG |   |     |   |   |
| TCAGATCTCagact--gatcCACCGGTCGC  | 1 | 20  | 2 | 0 |
| AGTCTAGagctcga--ctAGGTGGCCAGCG  |   |     |   |   |
| GTCAGATCCGctag--accgGTCGCCACCA  | 1 | 49  | 3 | 0 |
| CAGTCTAggcgatc--tGGCCAGCGCTGGT  |   |     |   |   |
| TCCGCTAGCGctac--ggcgAGGAGCTGTT  | 1 | 68  | 3 | 0 |
| AGGCGATcgcgatg--cCGCTCCTCGACAA  |   |     |   |   |
| GACTCAGATCtcta--gatcCACCGGTCGC  | 1 | 22  | 4 | 0 |
| CTGAGTctagagct--CTAGGTGGCCAGCG  |   |     |   |   |
| CAGATCTCGAGCTC--caccGGGGTGGTGC  | 1 | 59  | 1 | 6 |
| GTCTAGAGCTCGAg--gtgGCCCCACCACG  |   |     |   |   |
| TCCAAGTCTCacc--ttcaCCGGGGTGGT   | 1 | 274 | 1 | 0 |
| AGGTTCAGAGGtgg--aagtGCCCCACCA   |   |     |   |   |
| GTTTTGGCACcaaa--ctacGGCAAGCTGA  | 1 | 333 | 2 | 0 |
| CAAAACCGtggttt--gaTGCCGTTCGACT  |   |     |   |   |
| CCGGCCCCATTgacg--tggaCGGCGACGT  | 1 | 104 | 0 | 0 |
| GGCCGGGGTAActgc--acctGCCGCTGCA  |   |     |   |   |
| GCGTGTACGtgg--ccgGGGTGGTGCCCA   | 1 | 136 | 1 | 0 |
| CGCACATGCcacc--ggCCCCACCAGGGT   |   |     |   |   |

| Non-compatible ends |                | n | size of deletion | size of μhomology | size of insertion |
|---------------------|----------------|---|------------------|-------------------|-------------------|
| 5' TCAGATCTCGAGCT   | CGCGGGCCCG     |   |                  |                   |                   |
| 3' AGTCTAGAGC       | CATGGCGCCCGGGC |   |                  |                   |                   |

| Erccl          |                | n | size of deletion | size of μhomology | size of insertion |
|----------------|----------------|---|------------------|-------------------|-------------------|
| TCAGATCTCgagct | cgcgGGCCCG     | 8 | 12               | 2                 | 0                 |
| AGTCTAGAgc     | catggcGCCCGGGC |   |                  |                   |                   |
| TCAGATCTCgagct | cgcGGGCCCCG    | 1 | 11               | 0                 | 0                 |
| AGTCTAGAGC     | catggcgCCCGGGC |   |                  |                   |                   |
| TCAGATCTCgagct | cgcGGGCCCCG    | 5 | 10               | 2                 | 0                 |
| AGTCTAGAgc     | catgGCCCGGGC   |   |                  |                   |                   |
| TCAGATCTCgagct | CGCGGGCCCCG    | 4 | 8                | 0                 | 0                 |
| AGTCTAGAGC     | catgGCGCCCGGGC |   |                  |                   |                   |
| TCAGATCTCgAgct | CCCGGGCCCCG    | 1 | 6                | 1                 | 2                 |

|                               |                        |   |     |   |   |
|-------------------------------|------------------------|---|-----|---|---|
| AGTCTAGAGC                    | <b>caT</b> GGCGCCCGGGC |   |     |   |   |
| TCAGATCTCGAG <b>Ct</b>        | CGCGGGCCCG             | 1 | 5   | 1 | 3 |
| AGTCTAGAG <b>CTC</b>          | <b>cat</b> GGCGCCCGGGC |   |     |   |   |
| GTGAAC <b>Cgtcag--ccgg</b>    | GATCCACCGTC            | 1 | 50  | 1 | 0 |
| CACTTGG <b>cagtc--ggc</b>     | CCTAGGTGGCAG           |   |     |   |   |
| GTCAGAT <b>Ccgct--gccc</b>    | GGGATCCACCG            | 1 | 40  | 1 | 0 |
| CAGTCTA <b>ggcga--cgg</b>     | GCCCTAGGTGGC           |   |     |   |   |
| GTTTAG <b>GAaccg--gtga</b>    | GCAAGGGCGA             | 1 | 78  | 4 | 0 |
| CAAAT <b>cacttggc--CACT</b>   | CGTTCCCGCT             |   |     |   |   |
| ACCGTCAGAT <b>ccg--cggg</b>   | ATCCACCGGT             | 1 | 45  | 0 | 0 |
| TGGCAGTCT <b>aggc--gccc</b>   | TAGGTGGCCA             |   |     |   |   |
| AGATCCGCT <b>agcg--aggg</b>   | CGAGGAGCTG             | 1 | 70  | 0 | 0 |
| TCTAGGCGAT <b>cg--tccc</b>    | GCTCCTCGAC             |   |     |   |   |
| CAGATCTCG <b>AGCTC--agct</b>  | GCCGACCA               | 1 | 566 | 5 | 2 |
| GTCTAGAG <b>ctcga --TCGAG</b> | CGGCTGGT               |   |     |   |   |
| TAGCGCTACCG <b>actc--gttc</b> | GAGGGCGA               | 1 | 419 | 0 | 0 |
| ATCGCGATGG <b>ctgag--caag</b> | CTCCCGCT               |   |     |   |   |
| TCTC <b>GAGCTaagct--gagct</b> | ACCAGTCCGC             | 1 | 668 | 5 | 0 |
| AGAG <b>ctcgattcga--CTCGA</b> | TGGTCAGGCG             |   |     |   |   |
| CGCAAATGG <b>gcgg--tggt</b>   | GCCATCCTG              | 1 | 159 | 2 | 0 |
| GCGTTTACCG <b>cc--acca</b>    | GGTAGGAC               |   |     |   |   |
| TTTTGGCA <b>Caaa--gtgc</b>    | CCATCCTGGT             | 1 | 220 | 1 | 0 |
| AAAACCGT <b>ggttt--cac</b>    | GGTAGGACCA             |   |     |   |   |
| GGTAGGCGT <b>gtacg--ccat</b>  | GGTGGAGCAGC            | 1 | 113 | 0 | 0 |
| CCATCCGCAC <b>atgc--ggta</b>  | CCACTCGTTC             |   |     |   |   |
