# Supplementary material
Source: PubMed Central journal article supplement (PMC2519706)
Supplement: supp_28_16_5082__2.pdf [file supp_28_16_5082__2.pdf]

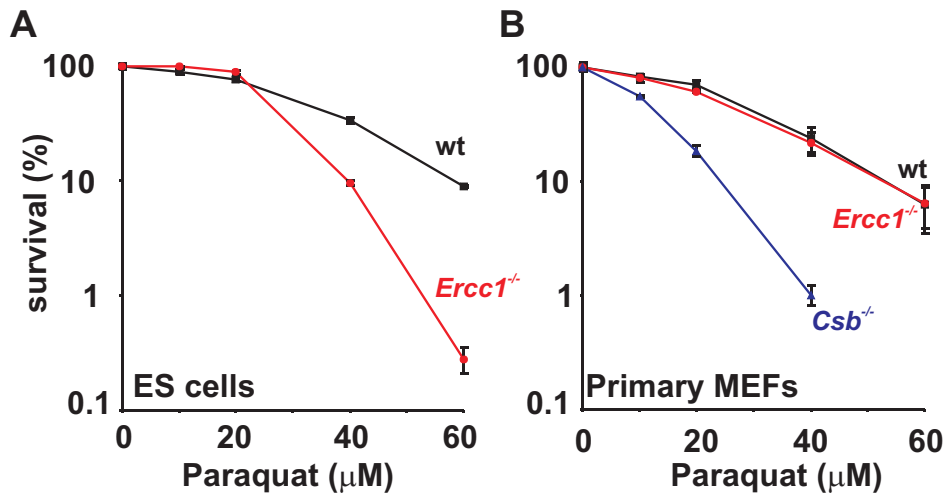

Supplemental Fig. S1. Clonogenic survival assays. Cells were plated on 6 cm dishes in triplicate and exposed to the oxidizing agent paraquat. Colonies were fixed, stained and counted 7-10 d post-treatment. Error bars represent the standard error of the mean from three independent experiments. (A) Wt and *Ercc1*<sup>-/-</sup> mouse embryonic stem cells. (B) Wt, *Ercc1*<sup>-/-</sup> and *Csb*<sup>-/-</sup> (positive control) primary MEFs.
