# Supplementary material
Source: PubMed Central journal article supplement (PMC2519706)
Supplement: supp_28_16_5082__3.pdf [file supp_28_16_5082__3.pdf]

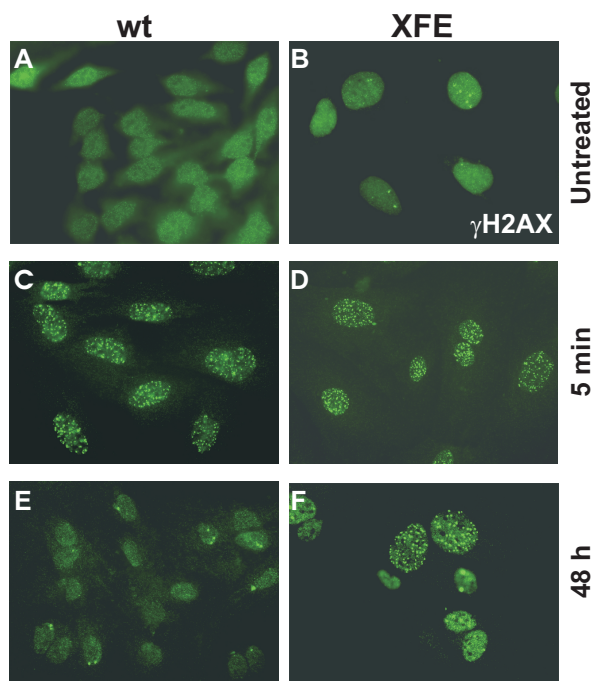

**Supplemental Fig. S 2. Immunostaining for  $\gamma$ H2AX, a marker of DNA double-strand breaks in wt and ERCC1-XPF-deficient (XFE) human fibroblasts. (A & B) Representative images of untreated cells. (C & D) The same cells 5 minutes post-irradiation (2 Gy). (E & F) Cells 48 hours after IR.**
