# Supplementary material
Source: PubMed Central journal article supplement (PMC2519706)
Supplement: supp_28_16_5082__4.pdf [file supp_28_16_5082__4.pdf]

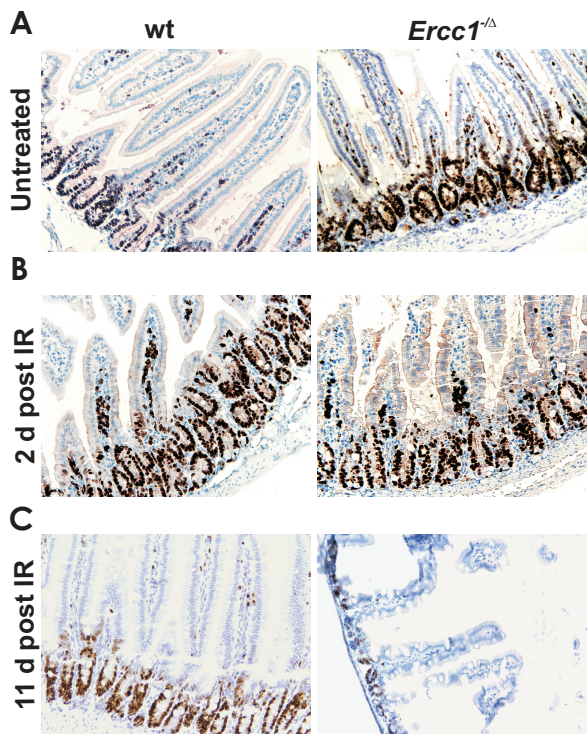

**Supplementary Fig. S 3.** Ki67 immunostaining of small intestine. Tissues sections were from 7-8 wk-old wt and *Ercc1*<sup>-Δ</sup> mice exposure to 6 Gy of IR. (A) Small intestine of untreated mice; (B) Small intestine of mice 2 d post-irradiation; (C) Small intestine of mice 11 d post-irradiation demonstrating loss of proliferative cells in the villi of *Ercc1*<sup>-Δ</sup> mice.
