# Supplementary material
Source: PubMed Central journal article supplement (PMC2519706)
Supplement: supp_28_16_5082__5.pdf [file supp_28_16_5082__5.pdf]

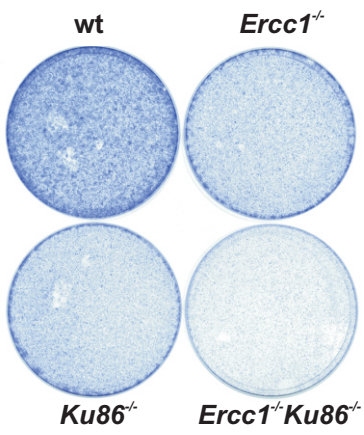

Supplemental Fig. S4. Representative cultures of wt, *Ercc1*<sup>-/-</sup>, *Ku86*<sup>-/-</sup> and *Ercc1*<sup>-/-</sup>*Ku86*<sup>-/-</sup> primary MEFs, indicating relative cell density at passage 3 at 3% oxygen.
